# Supplementary material for: In-depth study of pyroptosis-related genes and immune infiltration in colon cancer
Source: PeerJ. 2024 Oct 29;12:e18374. doi: 10.7717/peerj.18374 (PMC11529595; doi:10.7717/peerj.18374)
Supplement: Supplemental Information 1 [file peerj-12-18374-s001.xlsx]

## Sheet: TNNC1数据
	GAPDH			TNNC1
CCD841CON	16.53	16.38		30.75	30.47
SW480	14	14.12	14	22.53	22.44	22.52
SW620	13.42	13.63	13.69	24.41	24.54	24.47
HT29	14.36	14.34	14.42	26.65	26.92	26.68
HCT116	13.47	13.54	13.63	25.68	25.73	25.66
CCD841CON	13.59	13.85	13.51	27.83	27.94	28.18
SW480	13.81	13.9	14.02	22.5	22.35	22.35
SW620	13.19	13.38	13.25	24.19	23.95
HT29	13.61	13.51	13.57	25.83	26.21
HCT116	12.71	12.93	13.12	25.49	25.26	25.27
CCD841CON	14.34	14.23	14.33	30.51	30.47	30.23
SW480	12.82	12.69		23.58	23.33	23.27
SW620	11.73	11.62	11.77	24.35	24.61	24.72
HT29	12.78	12.31	12.73	26.93	26.62	26.78
HCT116	11.64	11.65	11.78	26.37	26.13	25.97
CCD841CON	13.68	13.84	13.71	27.58	27.42	27.48
SW480	14.13	14.14	13.8	21.92	21.79	21.49
SW620	13.3	13.38	13.19	23.14	23	23.03
HT29	13.93	13.83	13.66	25.02	24.95	25.01
HCT116	13.18	13.2	12.98	24.94	24.94	24.65
