# Supplementary material for: In-depth study of pyroptosis-related genes and immune infiltration in colon cancer
Source: PeerJ. 2024 Oct 29;12:e18374. doi: 10.7717/peerj.18374 (PMC11529595; doi:10.7717/peerj.18374)
Supplement: Supplemental Information 2 [file peerj-12-18374-s002.xlsx]

## Sheet: Sheet1
Details for IHC score
Location	Tissue type			Cytoplasm			Note			n	TNNC1 expression			p value
		Pathologic classification		Staining intensity	positive rate	Score					High	Low
A1	Paracancer	NATs		1	0.4	40%			Cancer	28	15	13		p<0.0001
A2	Paracancer	normal adjacent tissues (NATs)		2	1		Most tissues missing		Paracancer	22	1	21
A3	cancer	mucinous adenocarcinoma					Lost
A4	Paracancer	NATs		3	1		A small amount of glands; most tissues missing
A5	cancer	mucinous adenocarcinoma		3	0.95	285%
A6	Paracancer	NATs		2	0.4	80%
A7	cancer	mucinous adenocarcinoma		2	0.9	180%
A8	Paracancer	NATs		2	0.1	20%
A9	cancer	mucinous adenocarcinoma		3	0.9	270%
A10	Paracancer	NATs		2	0.2	40%
B1	cancer	mucinous adenocarcinoma		2	0.9	180%
B2	Paracancer	NATs		2	0.3	60%
B3	cancer	mucinous adenocarcinoma		3	0.9	270%
B4	Paracancer	NATs		1	0.05	5%
B5	cancer	mucinous adenocarcinoma		2	0.8	160%
B6	Paracancer	NATs		1	0.05	5%
B7	cancer	mucinous adenocarcinoma		2	0.9	180%
B8	Paracancer	NATs		2	0.7	140%
B9	cancer	mucinous adenocarcinoma		3	0.6	180%
B10	Paracancer	NATs		2	0.1	20%
C1	cancer	mucinous adenocarcinoma		3	0.95	285%
C2	Paracancer	NATs		1	0.05	5%
C3	cancer	mucinous adenocarcinoma		2	0.9	180%
C4	Paracancer	NATs		1	0.05	5%
C5	cancer	mucinous adenocarcinoma					No epithelial or cancerous tissue
C6	Paracancer	NATs		2	0.05	10%
C7	cancer	mucinous adenocarcinoma		2	0.9	180%
C8	Paracancer	NATs		2	0.7	140%	Most tissues missing
C9	cancer	mucinous adenocarcinoma		3	0.8	240%
C10	Paracancer	NATs		1	0.1	10%
D1	cancer	mucinous adenocarcinoma		3	0.7	210%
D2	Paracancer	NATs					Lost
D3	cancer	mucinous adenocarcinoma		2	0.8	160%
D4	Paracancer	NATs					Lost
D5	cancer	mucinous adenocarcinoma		2	0.8	160%
D6	Paracancer	NATs					No epithelial tissue
D7	cancer	mucinous adenocarcinoma					missing
D8	Paracancer	NATs					No epithelial tissue
D9	cancer	mucinous adenocarcinoma		3	0.9	270%
D10	Paracancer	NATs		2	0.2	40%
E1	cancer	mucinous adenocarcinoma		1	0.2	20%
E2	Paracancer	NATs		2	0.05	10%
E3	cancer	mucinous adenocarcinoma		2	0.3	60%
E4	Paracancer	NATs					No epithelial or cancerous tissue
E5	cancer	mucinous adenocarcinoma		2	0.8	160%
E6	Paracancer	NATs		2	0.02	4%
E7	cancer	mucinous adenocarcinoma		2	1	200%
E8	Paracancer	NATs					No epithelial tissue
E9	cancer	mucinous adenocarcinoma		2	0.8	160%
E10	Paracancer	NATs		1	0.05	5%
F1	cancer	mucinous adenocarcinoma		2	0.3	60%
F2	Paracancer	NATs		2	0.05	10%
F3	cancer	mucinous adenocarcinoma		1	0.9	90%
F4	Paracancer	NATs		2	0.05	10%
F5	cancer	mucinous adenocarcinoma		2	0.8	160%
F6	Paracancer	NATs		2	0.9	180%
F7	cancer	mucinous adenocarcinoma		2	50-55%	110%
F8	cancer	mucinous adenocarcinoma		1	0.9	90%
F9	cancer	mucinous adenocarcinoma		3	0.9	270%
F10	Paracancer	NATs		2	0.1	20%
G1	cancer	mucinous adenocarcinoma		2	0.7	140%
G2	Paracancer	NATs		2	80%	160%

## Sheet: Sheet2
A5	cancer	mucinous adenocarcinoma		3	0.95	285%
A7	cancer	mucinous adenocarcinoma		2	0.9	180%
A9	cancer	mucinous adenocarcinoma		3	0.9	270%
B1	cancer	mucinous adenocarcinoma		2	0.9	180%
B3	cancer	mucinous adenocarcinoma		3	0.9	270%
B5	cancer	mucinous adenocarcinoma		2	0.8	160%
B7	cancer	mucinous adenocarcinoma		2	0.9	180%
B9	cancer	mucinous adenocarcinoma		3	0.6	180%
C1	cancer	mucinous adenocarcinoma		3	0.95	285%
C3	cancer	mucinous adenocarcinoma		2	0.9	180%
C7	cancer	mucinous adenocarcinoma		2	0.9	180%
C9	cancer	mucinous adenocarcinoma		3	0.8	240%
D1	cancer	mucinous adenocarcinoma		3	0.7	210%
D3	cancer	mucinous adenocarcinoma		2	0.8	160%
D5	cancer	mucinous adenocarcinoma		2	0.8	160%
D9	cancer	mucinous adenocarcinoma		3	0.9	270%
E1	cancer	mucinous adenocarcinoma		1	0.2	20%
E3	cancer	mucinous adenocarcinoma		2	0.3	60%
E5	cancer	mucinous adenocarcinoma		2	0.8	160%
E7	cancer	mucinous adenocarcinoma		2	1	200%
E9	cancer	mucinous adenocarcinoma		2	0.8	160%
F1	cancer	mucinous adenocarcinoma		2	0.3	60%
F3	cancer	mucinous adenocarcinoma		1	0.9	90%
F5	cancer	mucinous adenocarcinoma		2	0.8	160%
F7	cancer	mucinous adenocarcinoma		2	50-55%	110%
F8	cancer	mucinous adenocarcinoma		1	0.9	90%
F9	cancer	mucinous adenocarcinoma		3	0.9	270%
G1	cancer	mucinous adenocarcinoma		2	0.7	140%

## Sheet: Sheet3
A1	Paracancer	NATs		1	0.4	40%
A6	Paracancer	NATs		2	0.4	80%
A8	Paracancer	NATs		2	0.1	20%
A10	Paracancer	NATs		2	0.2	40%
B2	Paracancer	NATs		2	0.3	60%
B4	Paracancer	NATs		1	0.05	5%
B6	Paracancer	NATs		1	0.05	5%
B8	Paracancer	NATs		2	0.7	140%
B10	Paracancer	NATs		2	0.1	20%
C2	Paracancer	NATs		1	0.05	5%
C4	Paracancer	NATs		1	0.05	5%
C6	Paracancer	NATs		2	0.05	10%
C10	Paracancer	NATs		1	0.1	10%
D10	Paracancer	NATs		2	0.2	40%
E2	Paracancer	NATs		2	0.05	10%
E6	Paracancer	NATs		2	0.02	4%
E10	Paracancer	NATs		1	0.05	5%
F2	Paracancer	NATs		2	0.05	10%
F4	Paracancer	NATs		2	0.05	10%
F6	Paracancer	NATs		2	0.9	180%
F10	Paracancer	NATs		2	0.1	20%
G2	Paracancer	NATs		2	80%	160%
