# Supplementary material for: In-depth study of pyroptosis-related genes and immune infiltration in colon cancer
Source: PeerJ. 2024 Oct 29;12:e18374. doi: 10.7717/peerj.18374 (PMC11529595; doi:10.7717/peerj.18374)
Supplement: Supplemental Information 3 [file peerj-12-18374-s003.xls]

## Sheet: Sheet1
ITEM TO CHECK	IMPORTANCE	CHECKLIST
EXPERIMENTAL DESIGN
Definition of experimental and control groups	E	manuscript page 181-182
Number within each group	E	manuscript page176-180
Assay carried out by core lab or investigator's lab?	D
Acknowledgement of authors' contributions	D
SAMPLE
Description	E	manuscript page181-182
Volume/mass of sample processed	D
Microdissection or macrodissection	E	manuscript page181-182
Processing procedure	E	manuscript page183-184
If frozen - how and how quickly?	E	manuscript page183-184
If fixed - with what, how quickly?	E	manuscript page183-184
Sample storage conditions and duration (especially for FFPE samples)	E	manuscript page176-180
NUCLEIC ACID EXTRACTION
Procedure and/or instrumentation	E	manuscript page 182-184
Name of kit and details of any modifications	E	manuscript page 182-184
Source of additional reagents used	D
Details of DNase or RNAse treatment	E	manuscript page 191-193
Contamination assessment (DNA or RNA)	E	manuscript page 184
Nucleic acid quantification	E	manuscript page 184
Instrument and method	E	manuscript page 182-186
Purity (A260/A280)	D
Yield	D
RNA integrity method/instrument	E	manuscript page 182-186
RIN/RQI or Cq of 3' and 5' transcripts	E	manuscript page 182-186
Electrophoresis traces	D
Inhibition testing (Cq dilutions, spike or other)	E	manuscript page 182-186
REVERSE TRANSCRIPTION
Complete reaction conditions	E	manuscript page 187
Amount of RNA and reaction volume	E	manuscript page 188
Priming oligonucleotide (if using GSP) and concentration	E	manuscript page 187
Reverse transcriptase and concentration	E	manuscript page 187
Temperature and time	E	manuscript page 187
Manufacturer of reagents and catalogue numbers	D
Cqs with and without RT	D*
Storage conditions of cDNA	D
qPCR TARGET INFORMATION
If multiplex, efficiency and LOD of each assay.	E	manuscript page 189
Sequence accession number	E	manuscript page 194-196
Location of amplicon	D
Amplicon length	E	manuscript page 194-196
In silico specificity screen (BLAST, etc)	E	manuscript page 194-196
Pseudogenes, retropseudogenes or other homologs?	D
Sequence alignment	D
Secondary structure analysis of amplicon	D
Location of each primer by exon or intron (if applicable)	E	manuscript page 194-196
What splice variants are targeted?	E	manuscript page 194-196
qPCR OLIGONUCLEOTIDES
Primer sequences	E	manuscript page 194-196
RTPrimerDB Identification Number	D
Probe sequences	D**
Location and identity of any modifications	E	manuscript page 194-196
Manufacturer of oligonucleotides	D
Purification method	D
qPCR PROTOCOL
Complete reaction conditions	E	manuscript page 187-188
Reaction volume and amount of cDNA/DNA	E	manuscript page 188
Primer, (probe), Mg++ and dNTP concentrations	E	manuscript page 187-188
Polymerase identity and concentration	E	manuscript page 187-188
Buffer/kit identity and manufacturer	E	manuscript page 187-188
Exact chemical constitution of the buffer	D
Additives (SYBR Green I, DMSO, etc.)	E	manuscript page 187-188
Manufacturer of plates/tubes and catalog number	D
Complete thermocycling parameters	E	manuscript page 187-188
Reaction setup (manual/robotic)	D
Manufacturer of qPCR instrument	E	manuscript page 189
qPCR VALIDATION
Evidence of optimisation (from gradients)	D
Specificity (gel, sequence, melt, or digest)	E	supplemental dates
For SYBR Green I, Cq of the NTC	E	manuscript page 187-189
Standard curves with slope and y-intercept	E	supplemental dates
PCR efficiency calculated from slope	E	supplemental dates
Confidence interval for PCR efficiency or standard error	D
r2 of standard curve	E	supplemental dates
Linear dynamic range	E	supplemental dates
Cq variation at lower limit	E	supplemental dates
Confidence intervals throughout range	D
Evidence for limit of detection	E	supplemental dates
If multiplex, efficiency and LOD of each assay.	E	supplemental dates
DATA ANALYSIS
qPCR analysis program (source, version)	E	manuscript page 190-191
Cq method determination	E	manuscript page 190-191
Outlier identification and disposition	E	manuscript page 190-191
Results of NTCs	E	manuscript page 190-191
Justification of number and choice of reference genes	E	manuscript page 190-191
Description of normalisation method	E	manuscript page 190-191
Number and concordance of biological replicates	D
Number and stage (RT or qPCR) of technical replicates	E	manuscript page 190-191
Repeatability (intra-assay variation)	E	manuscript page 190-191
Reproducibility (inter-assay variation, %CV)	D
Power analysis	D
Statistical methods for result significance	E	manuscript page 190-191
Software (source, version)	E	manuscript page 203-204
Cq or raw data submission using RDML	D
Table 1. MIQE checklist for authors, reviewers and editors. All essential information (E) must be submitted with the manuscript. Desirable
information (D) should be submitted if available. If using primers obtained from RTPrimerDB, information on qPCR target, oligonucleotides,
protocols and validation is available from that source.
*: Assessing the absence of DNA using a no RT assay is essential when first extracting RNA. Once the sample has been validated as
RDNA-free, inclusion of a no-RT control is desirable, but no longer essential.
**: Disclosure of the probe sequence is highly desirable and strongly encouraged. However, since not all commercial pre-designed assay
vendors provide this information, it cannot be an essential requirement. Use of such assays is advised against.
